# Supplementary material for: Biomimetic fabrication of robust self-assembly superhydrophobic surfaces with corrosion resistance properties on stainless steel substrate
Source: Royal Society of Chemistry journal article supplement (doi:10.1039/c6ra06500g), 2016-01-01
Supplement: c6ra06500g1.pdf [file c6ra06500g1.pdf]

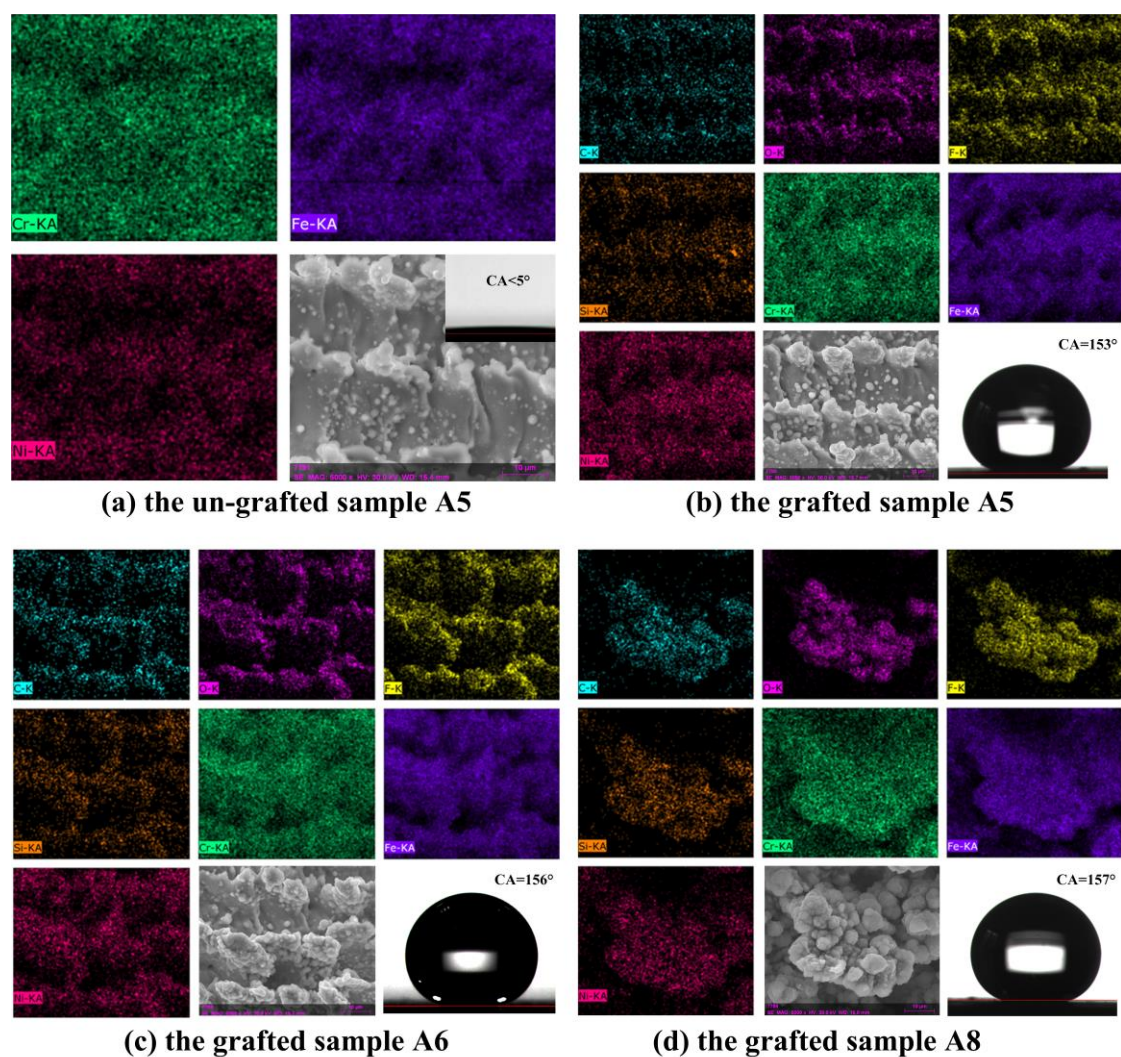

Figure. S1 EDS mapping images of different samples, (a) the un-grafted sample A5, (b) the grafted sample A5, (c) the grafted sample A6, (a) the grafted sample A8.

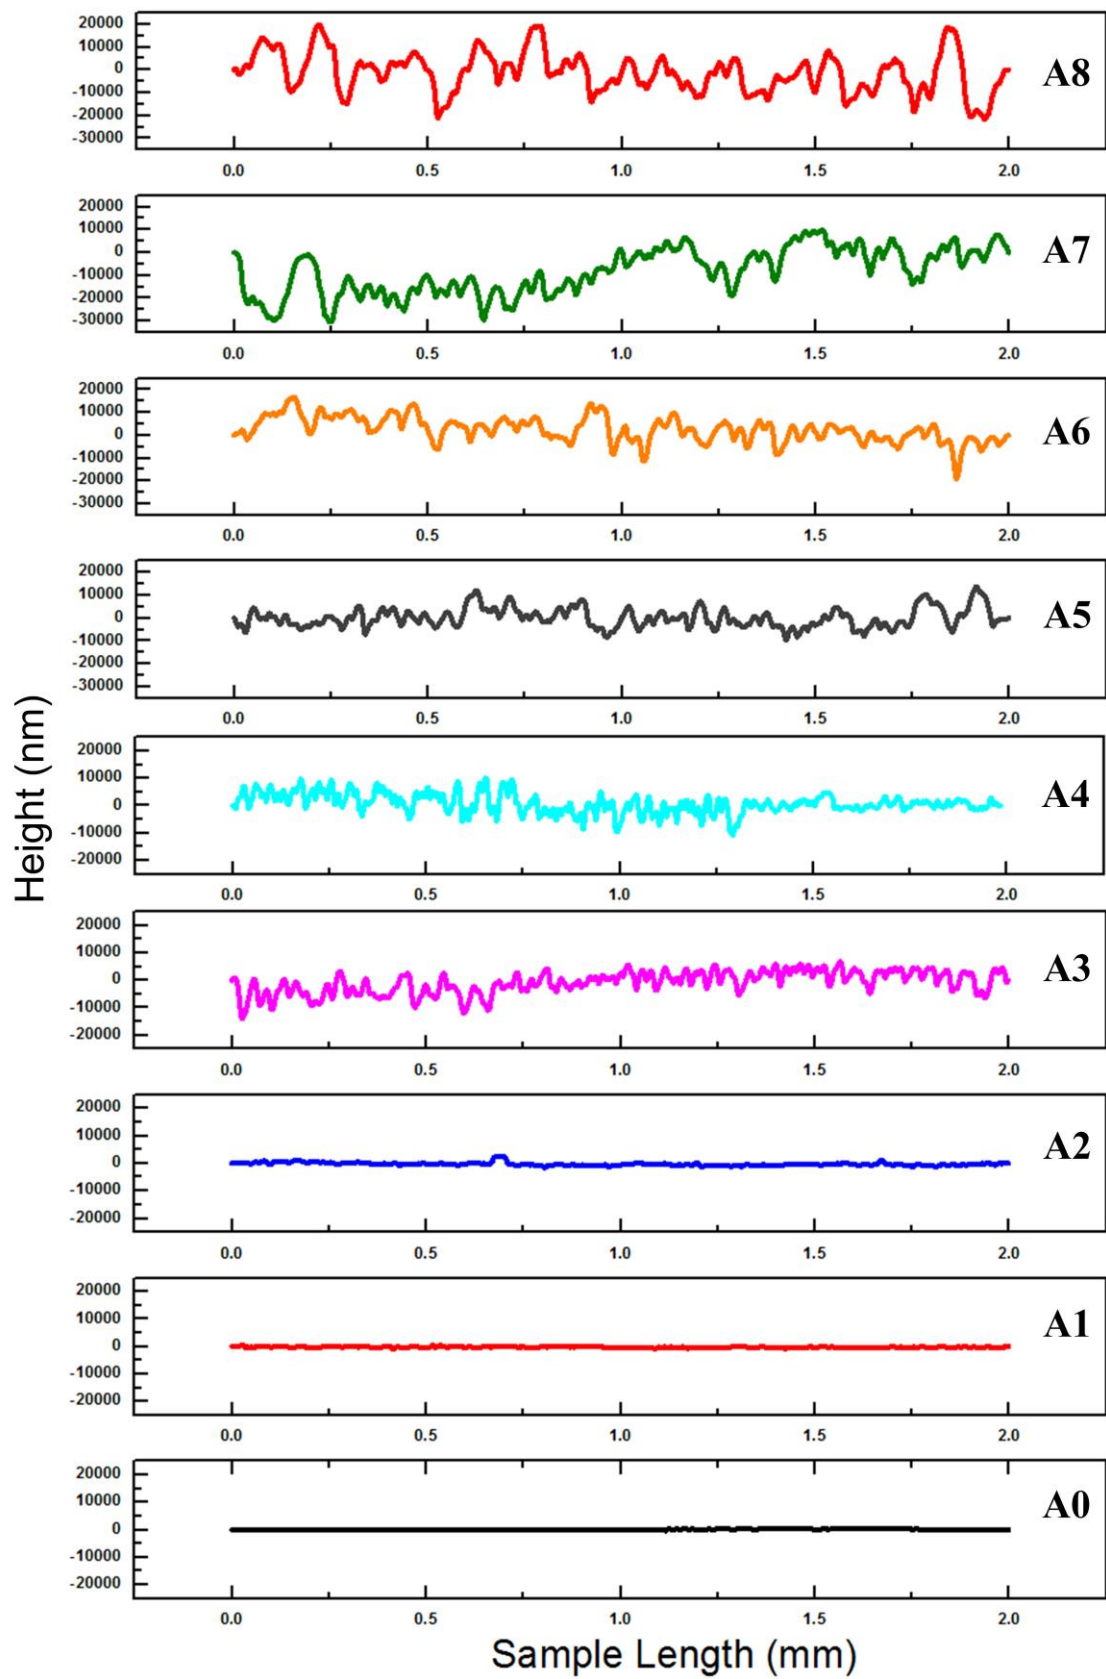

Figure .S2 Surface roughness profile curves of various samples.

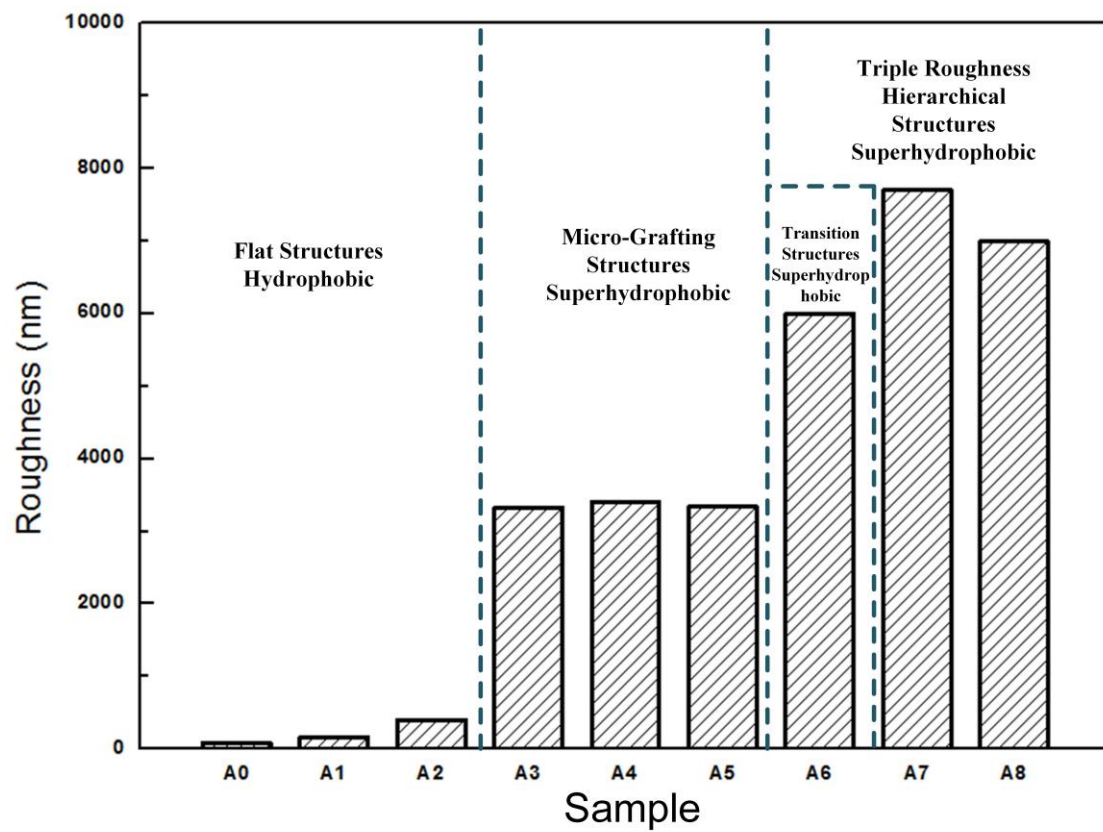

Figure. S3 A histogram of roughness in A series

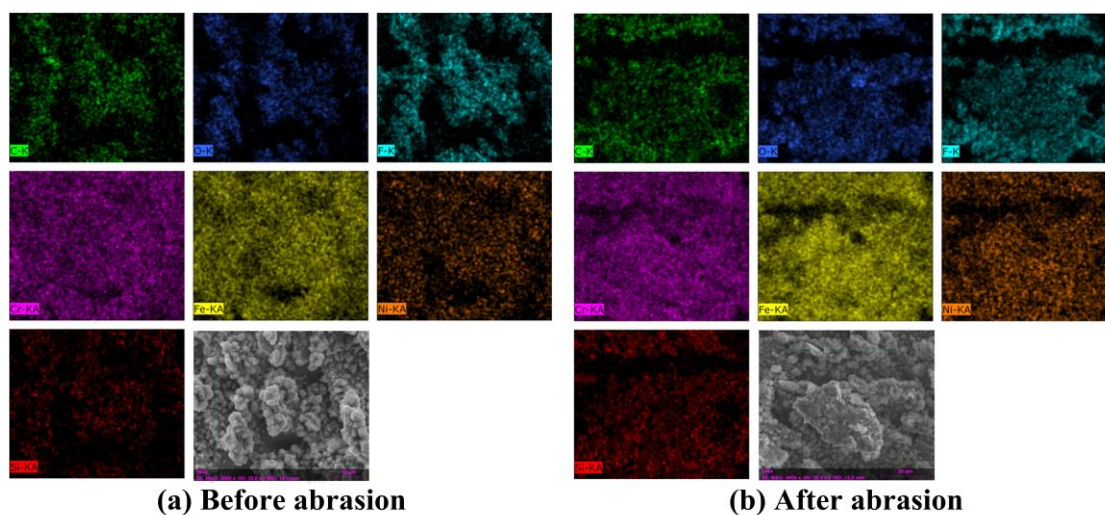

Figure. S4 chemical components of sample before/after abrasion 2.0 m at the applied pressure of 2.5 kPa, (a) before abrasion and (b) after abrasion.



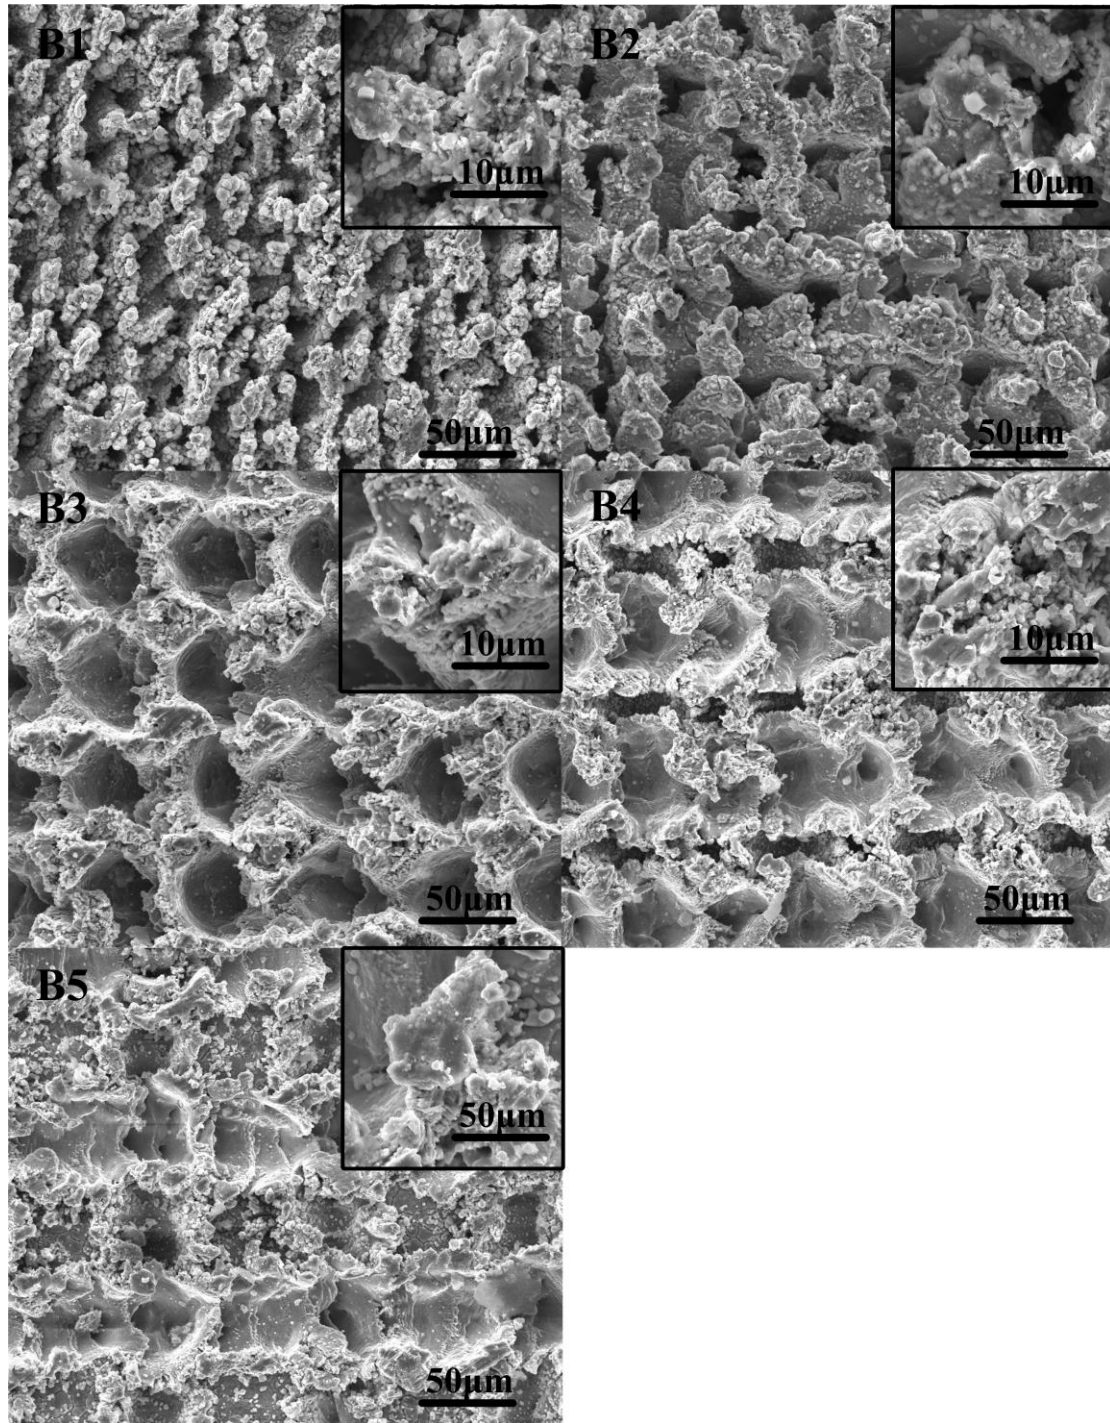

Figure. S5 SEM images of the abraded B series superhydrophobic surface after abrasion 2.5 m at the applied pressure of 12.5 kPa.

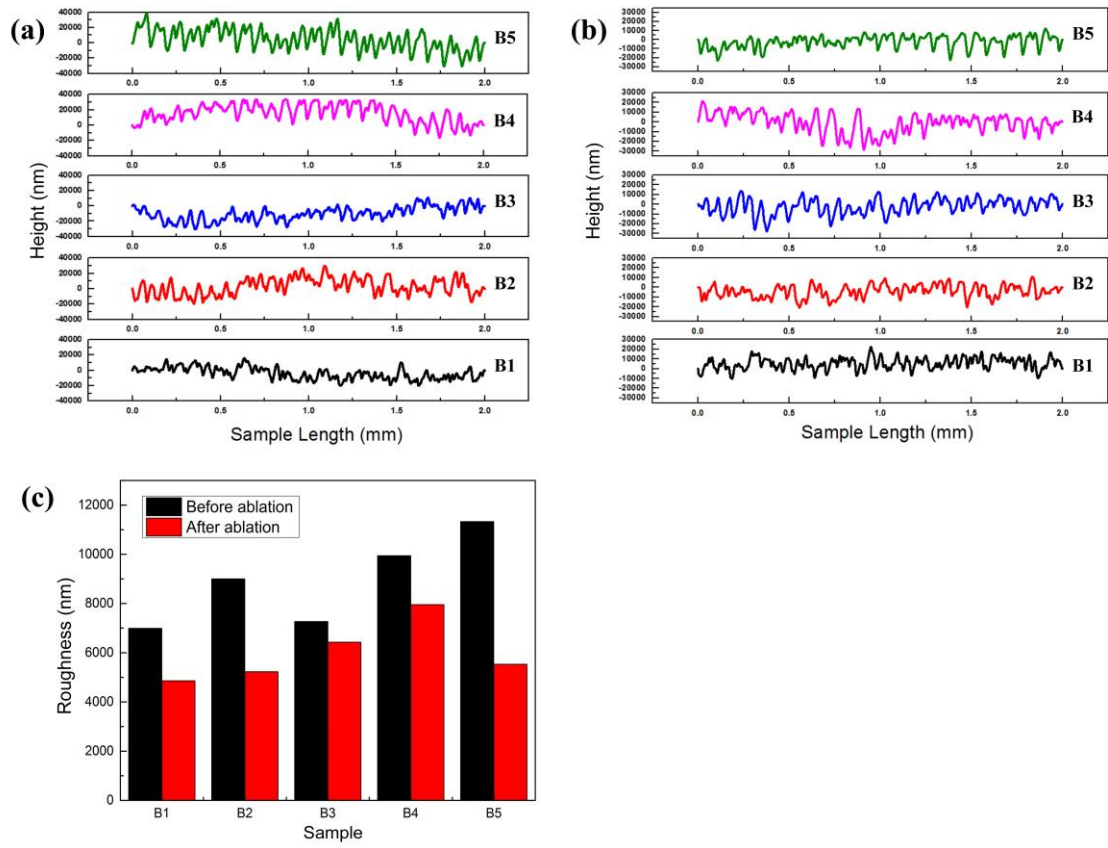

Figure. S6 Surface roughness profile curves of B series samples, (a) before abrasion, (b) after abrasion, (c) a histogram of surface roughness of samples B series.

Table. S1 the quantitative analysis result of chemical compositions of sample before/after abrasion

| Elements | Before abrasion (%) | After abrasion (%) |
|----------|---------------------|--------------------|
| C        | 15.28               | 16.16              |
| O        | 11.62               | 11.29              |
| F        | 15.74               | 13.77              |
| Cr       | 9.64                | 10.03              |
| Fe       | 42.1                | 42.70              |
| Ni       | 4.97                | 5.47               |
| Si       | 0.65                | 0.58               |

Table. S2 the quantitative analysis result of chemical compositions of B series sample after abrasion.

| <b>Elements</b> | <b>B1 (%)</b> | <b>B2 (%)</b> | <b>B3 (%)</b> | <b>B4 (%)</b> | <b>B5 (%)</b> |
|-----------------|---------------|---------------|---------------|---------------|---------------|
| C               | 10.27         | 7.82          | 8.59          | 7.93          | 8.29          |
| O               | 15.29         | 14.76         | 14.22         | 15.68         | 11.27         |
| F               | 6.00          | 1.54          | 2.38          | 1.65          | 1.08          |
| Si              | 0.61          | 0.41          | 0.42          | 0.4           | 0.38          |
